# Supplementary material for: Multifaceted modes of γ-tubulin complex recruitment and microtubule nucleation at mitotic centrosomes
Source: PubMed Central journal article supplement (PMC10497398; doi:10.1083/jcb.202212043), 2023-09-12

# SourceDataFS1

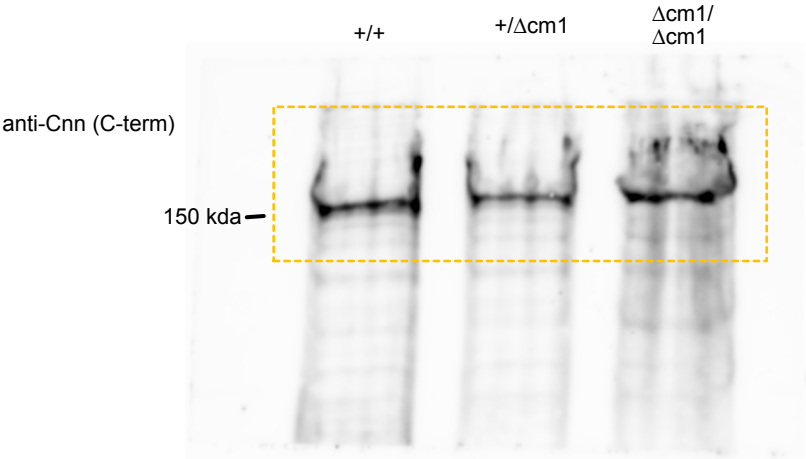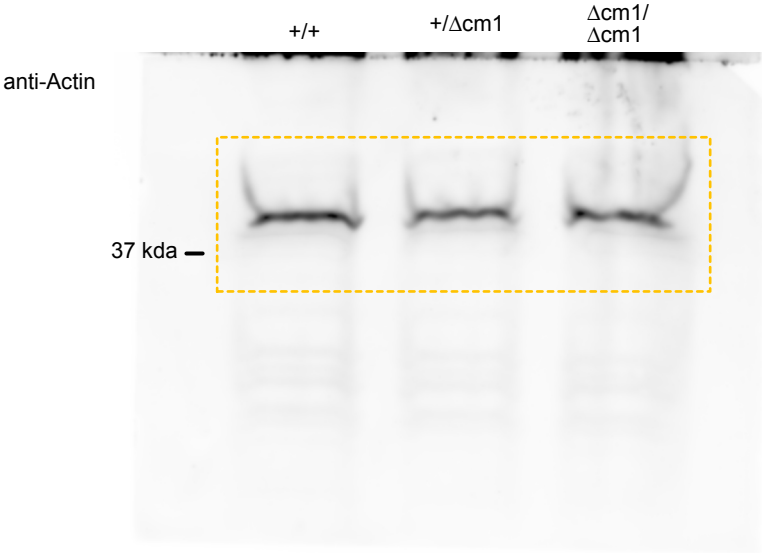

Supplement: JCB_202212043_SourceDataFS1.pdf [file JCB_202212043_SourceDataFS1.pdf]
